# Supplementary material
Source: PubMed Central journal article supplement (PMC4961550)

Supplemental figure

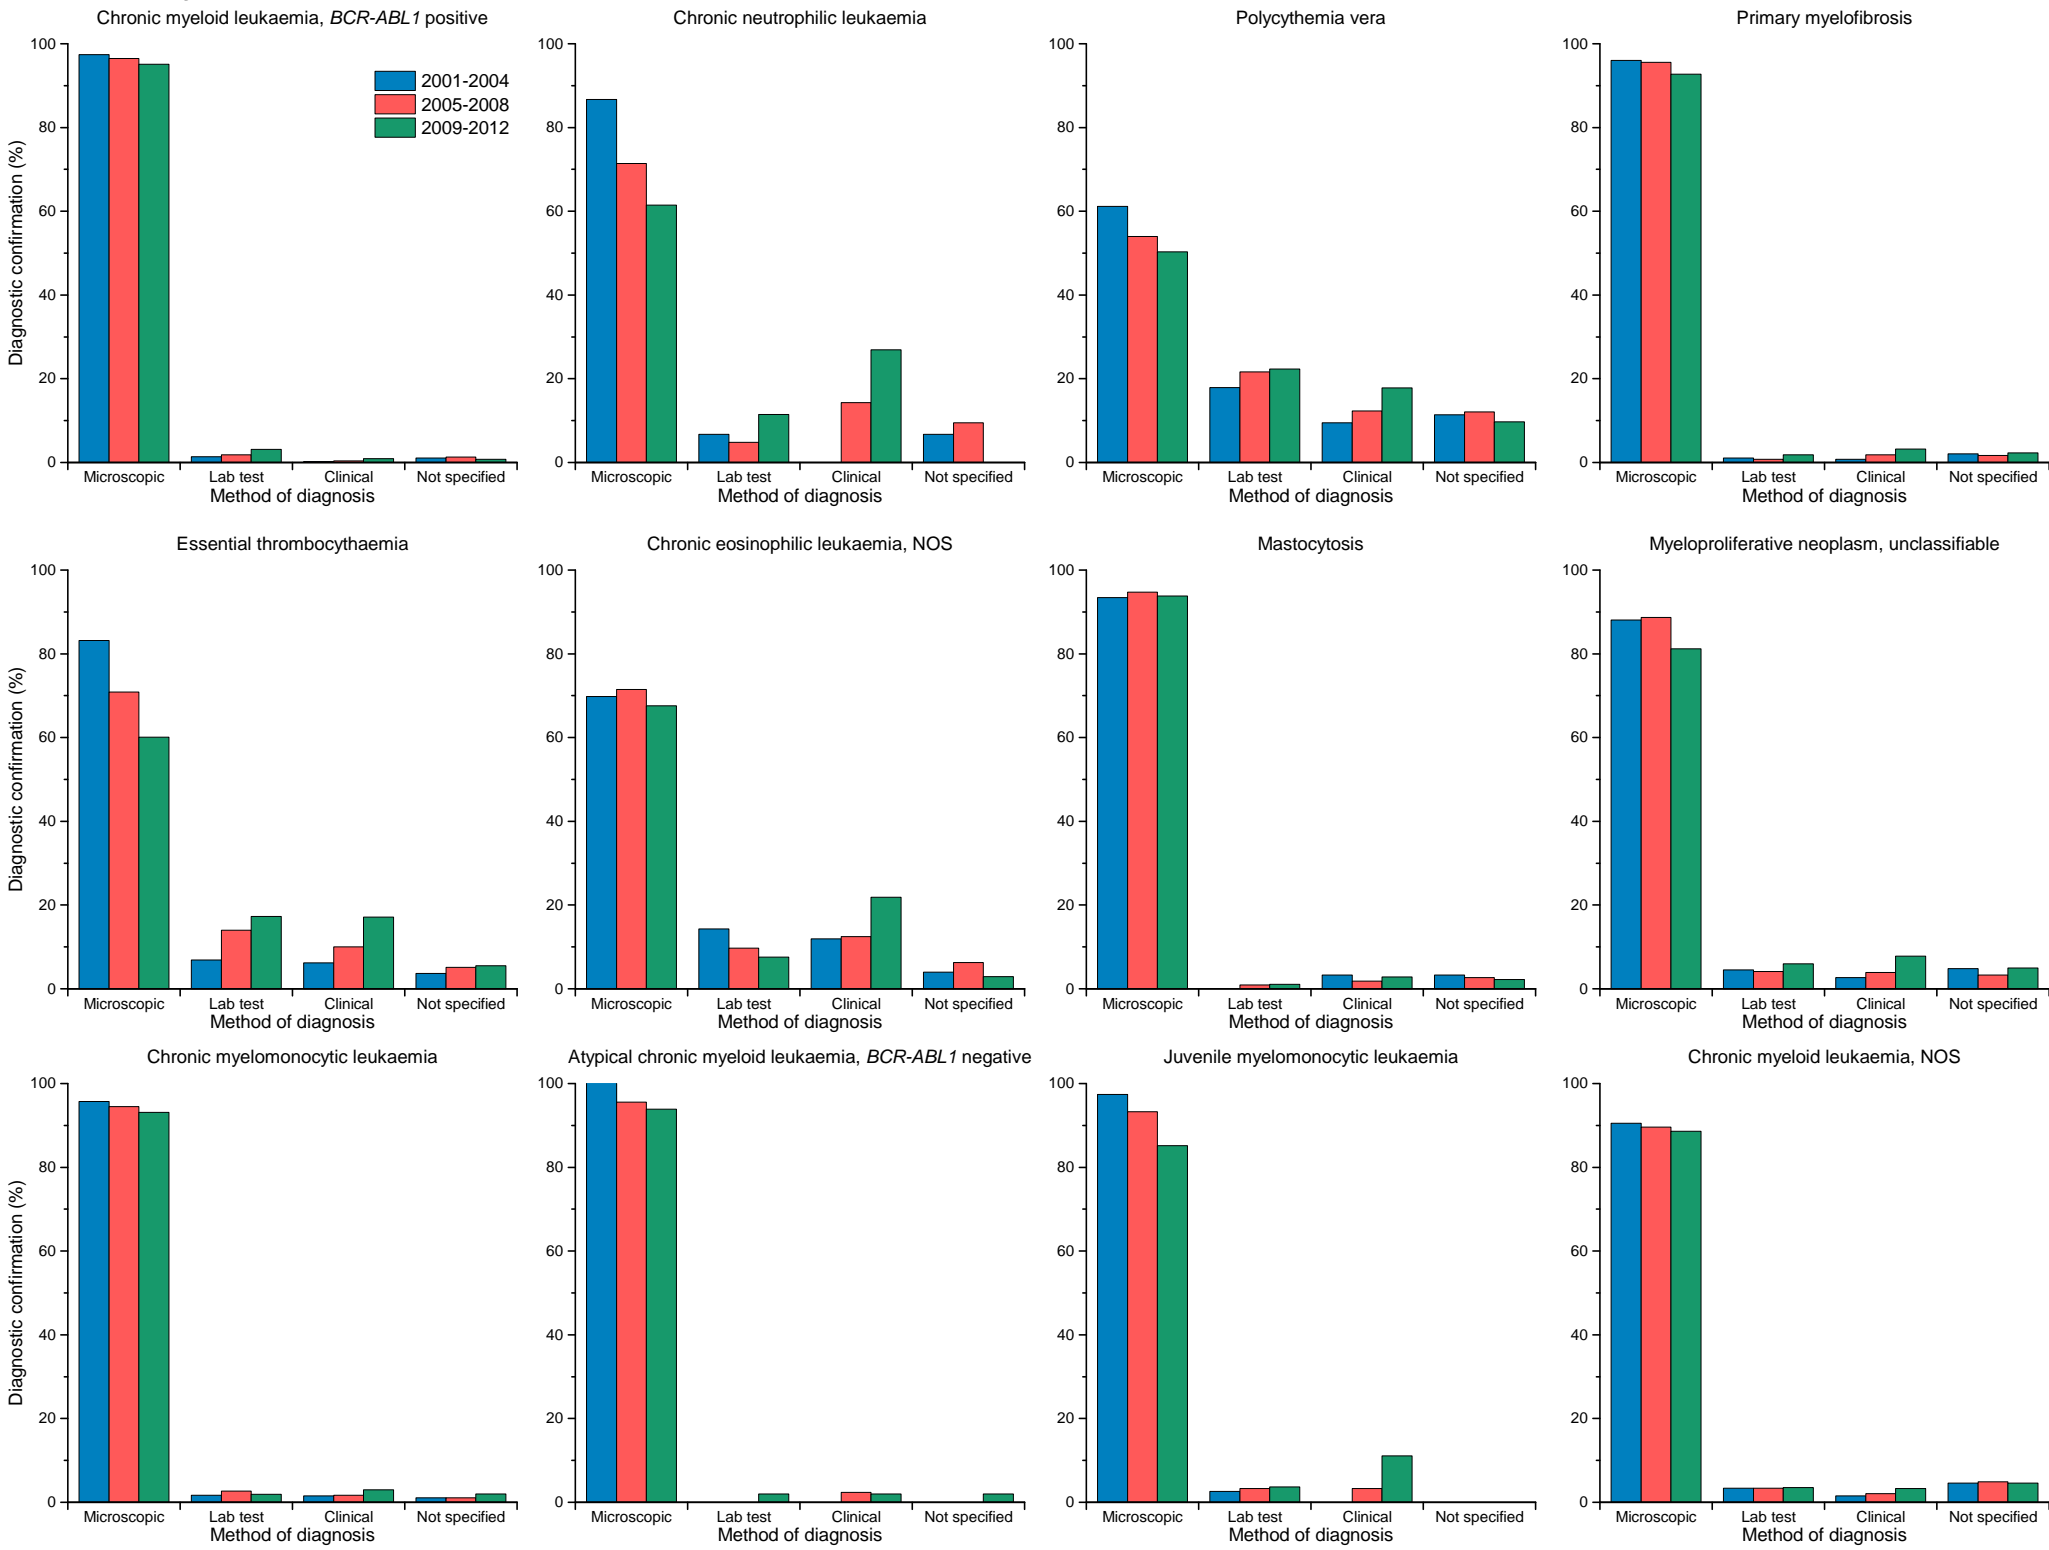

Supplement: NIHMS766780-supplement-Supp_Fig_S1.pdf [file NIHMS766780-supplement-Supp_Fig_S1.pdf]
